# Supplementary material for: IRF6 Regulates Alternative Activation by Suppressing PPARγ in Male Murine Macrophages
Source: Oxford University Press journal article supplement (doi:10.1210/en.2017-00053), 2017-06-22
Supplement: en.2017-00053_Supplemental_Figure_Legends.doc [file en.2017-00053_Supplemental_Figure_Legends.doc]

**Supplemental Figure 1. Efficiency of magnetic-bead-based enrichment of ATMs.** ATMs from mouse visceral adipose tissues were enriched using biotin-labeled antibody against CD11b and streptavidin-conjugated magnetic beads. Purity of enriched ATMs was examined with flow cytometry.

**Supplemental Figure 2. M2 macrophage presents higher CD206 surface expression than M1**. Surface expression of CD206 in M1 and M2 BMDMs were measured by flow cytometry. Asterisks indicate significant differences from M1 BMDMs, *****P*<0.0001.

**Supplemental Figure 3. Effects of IRF6 knockdown on IRF1, 3, 4, 5 and 8.** Gene expression of IRF1, IRF3, IRF4, IRF5 and IRF8 following IRF6 knockdown in M2 and M0 BMDMs were measured by RT-PCR. Data are presented as mean ± SEM (n=3). ev, BMDMs transfected with empty vector; shIRF6, BMDMs transduced with IRF6 specific shRNA. Asterisks indicate significant differences from empty vector transfected BMDMs, ***P*<0.01, ****P*<0.001.
